# Supplementary material for: Photoprinting and expansion-induced erasure with supramolecular hydrogels crosslinked by pseudorotaxanation
Source: Royal Society of Chemistry journal article supplement (doi:10.1039/d2ta10085a), 2023-01-01
Supplement: d2ta10085a1.pdf [file d2ta10085a1.pdf]

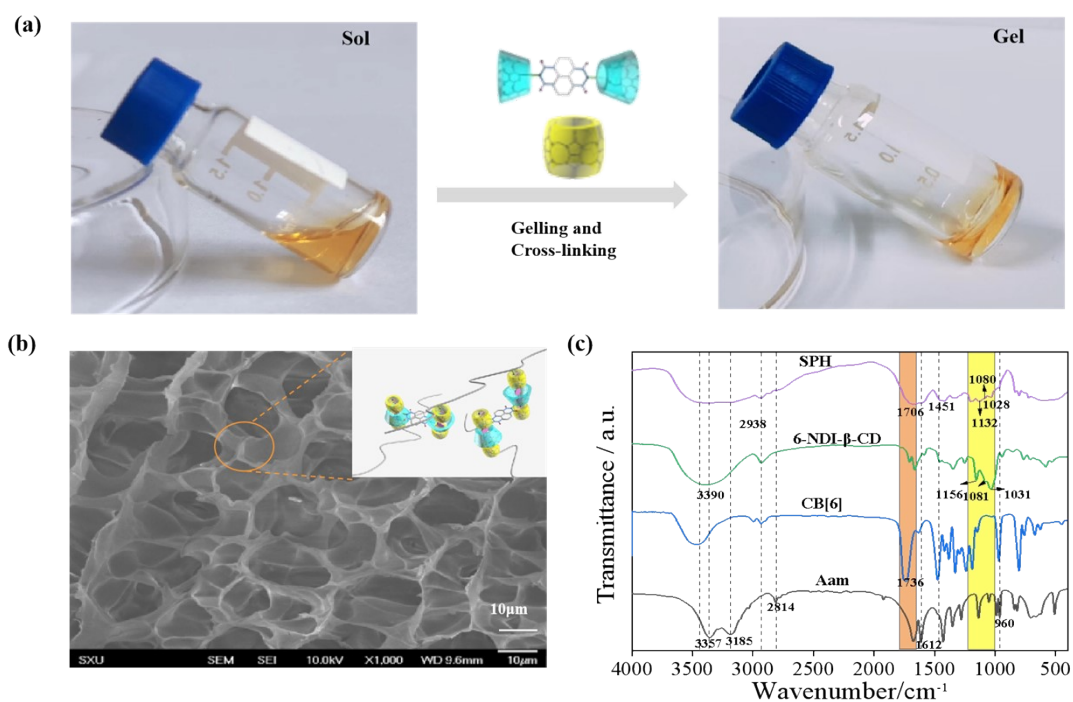

**Fig. 3** (a) A mixture of water, Paxle, 6-NDI-β-CD, and CB[6] in a 62:19:4:15 ratio before (left) and after heating at 70°C for 30 min and cooled down to room temperature (right). (b) SEM image and (c) FTIR spectrums of SPH.

Explanation:

In the proof of the article, the photograph of FTIR spectrums show the black area, so we wonder if we can choose the above image to replace the one in the proof of the article.
