# Supplementary material for: Photoprinting and expansion-induced erasure with supramolecular hydrogels crosslinked by pseudorotaxanation
Source: Royal Society of Chemistry journal article supplement (doi:10.1039/d2ta10085a), 2023-01-01
Supplement: d2ta10085a2.pdf [file d2ta10085a2.pdf]

## Supporting Information

### **Photoprinting and expansion-induced erasure with supramolecular hydrogels crosslinked by pseudo- rotaxanation**

Yanqin Rong,<sup>a</sup> Ran Liu,<sup>a</sup> Pengyue Jin,<sup>a</sup> Chunhong Liu,<sup>a</sup> Xiaoqian Wang,<sup>a</sup> Lizhi Fang,<sup>a</sup> Long Chen,<sup>a</sup>  
Wanhua Wu<sup>a</sup> and Cheng Yang<sup>\*a</sup>

<sup>a</sup>Key Laboratory of Green Chemistry & Technology of Ministry of Education, College of Chemistry,  
Sichuan University, 29 Wangjiang Road, Chengdu 610064, China. E-mail:  
[yangchengyc@scu.edu.cn](mailto:yangchengyc@scu.edu.cn)

### **Table of contents**

- 1. Experimental details**
- 2. Synthesis of compound 1–4, DHNDI, axle molecules and Pseudorotaxane gel**
- 3. NMR and HRMS spectra of compounds**
- 4. Synthesis and Characterization of the other Pseudorotaxane structure formed  
by CB[6], 6-NDI- $\beta$ -CD and Axle-1**
- 5. UV-vis spectra of 6-NDI-CDs**
- 6. Time-dependent CD spectral changes**
- 7. Properties investigations of the SPHs**

## **1. Experimental details**

### **Materials and Instruments.**

Cyclodextrins ( $\alpha$ ,  $\beta$ ,  $\gamma$ -CD) and  $\text{NaN}_3$  were respectively purchased from Tokyo Chemical Industry and Tianjin Meilin Industry and Trade Co., Ltd. Other used raw materials, including triphenylphosphine, p-toluene sulfonyl chloride and 1,4,5,8-naphthalene-tetracarboxylic dianhydride (NDA), and related reagents (ethanol, acetone, pyridine and DMF) were provided from Tianjin Kermel Chemical Reagent Co., Ltd and Chengdu Kelon Chemical Reagent Factory. Several  $\text{NH}_2$ -CDs samples in the experiment were synthesized as described in previously reported literature.<sup>1</sup> Likewise, CB [6] was also obtained and purified in advance according to the procedures in the literature.<sup>2</sup>  $^1\text{H}$  and  $^{13}\text{C}$  NMR spectra at 400 and 101 MHz, respectively, were measured at the ambient temperature on Bruker AMX-400 and all chemical shifts were calibrated with TMS as the internal standard. HRMS data were performed on Waters-Q-TOF Premiers (ESI) and MALDI-TOF mass spectrometer, reported in the unit of mass to charge ( $m/z$ ). UV-vis spectra were recorded using a JASCO V-650 spectrometer. Scanning electron microscopy (SEM) images were recorded on HITACHI SU-3500 instrument and Fourier transform infrared (FT-IR) spectroscopy measurements were performed on a IRTracer100 spectrophotometer. Circular dichroism spectra were measured on a JASCO J-1500 spectrometer. During the experiments, the photographs of hydrogels were taken with Digital Single Lens Reflex of Canon EOS 70D. The ultra-pure water was supplied with the Millipore system from USA.

### **Mechanical properties tests:**

The mechanical properties of the pseudorotaxane gels were measured using an INSTRON 3366 universal tensile testing with a 1KN load cell to perform the standard stress/strain experiments. Samples were prepared into a rectangular specimen shape (length:  $\sim 30$  mm; width: 8 mm; thickness:  $\sim 1.5$  mm), and the tensile rate was  $50 \text{ mm min}^{-1}$ . Young's modulus was determined from the initial slope of the stress-strain curves. Toughness was calculated by integrating the area below the stress/strain curve.

### **Self-healing experiments:**

A sample was cut into two completely separate pieces. The cut faces were gently pressed together, and the sample was placed in a glass-surface vessel to heat at  $50^\circ\text{C}$  for keeping several hours.

### **Shape memory studies:**

The  $40 \times 8 \times 1 \text{ mm}^3$  hydrogel sample was first immersed in deionized water for about 30 s. After stretching the sample, it was wrapped onto a glass rod and fixed with tapes to deform it into a spiral shape for 10 min. Finally, the spirally shaped sample was heated at  $50^\circ\text{C}$  by immersing it in deionized water until the shape of the deformed hydrogel achieved recovery. And all the processes were recorded.

## 2. Synthesis of compound 1–4, DHNDI, axle molecules and Pseudorotaxane gel

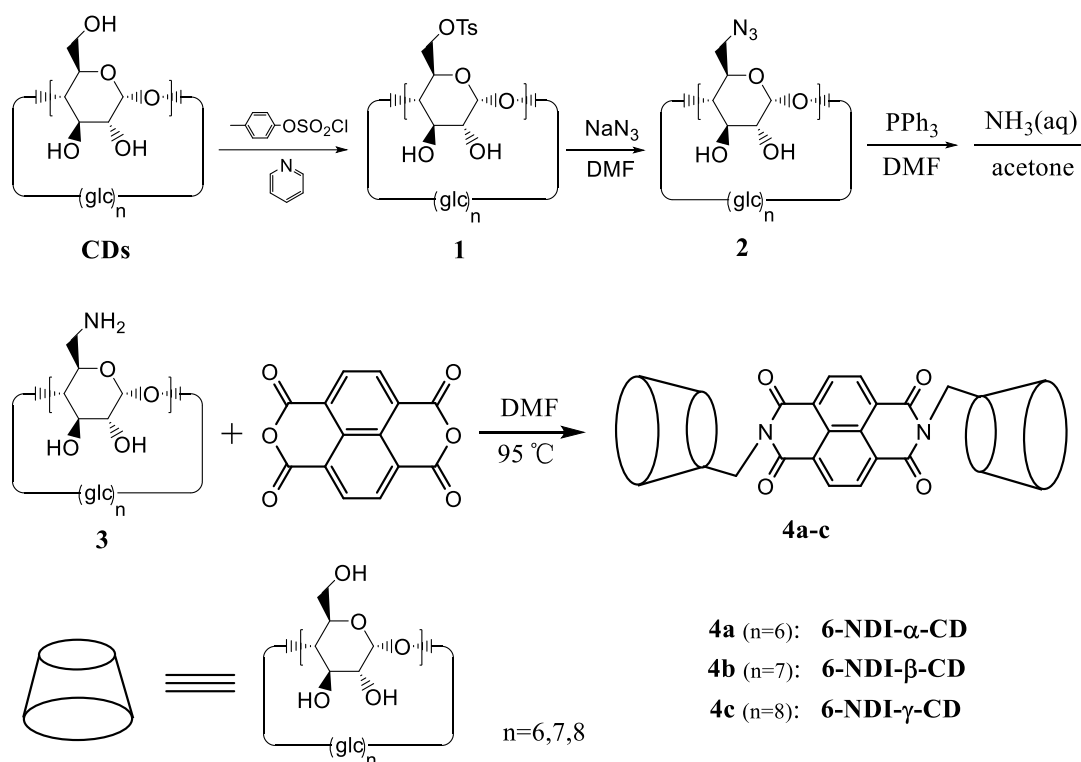

**Scheme S1.** The chemical structure and synthesis route of compounds 1–4.

### Synthesis of compounds 1–4:

Compound 1–3 was prepared according to our previous report.<sup>3</sup>

**1:** Native β-CD (5.0 g, 4.4 mmol) was dissolved in pyridine (80 mL), and p-toluene sulfonyl chloride (4.0 g, 21.1 mmol) was added in batches under stirring. The reaction mixture was further stirred at room temperature for 5 h, and the solvent was removed under reduced pressure. The crude products were subjected to a C18 reversed-phase column (gradient elution: 10–40 % EtOH), and 6-OTs-β-CD was given as a white solid after freeze-drying (1.7 g, 30.2%).

**2:** A mixture of 6-OTs-β-CD (1.7 g, 1.3 mmol) and NaN<sub>3</sub> (0.34 g, 5.2 mmol) in 20 mL DMF was stirred and heated at 80 °C for 3 h. After completion of the reaction, DMF was removed under vacuum, and the residue obtained was purified by using a C18 reversed-phase column eluted with aqueous ethanol (gradient elution from 10–40 % EtOH of 1.0 L) to afford the pure product of 6-N<sub>3</sub>-β-CD **2** (1.5 g, 80.1%).

**3:** In a flask, the mixture containing 6-N<sub>3</sub>-β-CD (1.5 g, 1.3 mmol), phosphorus triphenyl (1.5 g, 5.7 mmol) in DMF (10 mL) was kept stirring at room temperature for 4 h. Then 5 mL aqueous ammonia solution was added to the reaction solution and stirred for additional 5 h to make the intermediate hydrolysis thoroughly. Then the reaction mixture was poured into acetone to yield a white precipitate, which was collected by filtering to give 6-NH<sub>2</sub>-β-CD **3** (1.2 g, 82.0%).

#### 4a-c:

To a slurry of **3** (3.0 g, 2.6 mmol) and K<sub>2</sub>CO<sub>3</sub> (200 mg) in dry DMF (100 mL) was added 1,4,5,8-naphthalene-tetracarboxylic dianhydride (400 mg, 1.5 mmol). Then the mixture was heated at 95 °C under magnetic stirring for 6 h. After the solvent was removed under reduced pressure, a small amount of water was added to dissolve the crude product, which was purified by a reversed-phase chromatographic column gradually eluted from 5% to 30% aqueous EtOH to afford solid 6-NDI-β-CD **4b** (yield: 70.8 %). According to the same experimental procedures as above, 6-NDI-α-CD (**4a**, yield: 65.6 %) and 6-NDI-γ-CD (**4c**, yield: 62.9%) were synthesized in good yields.

**4a** : (Pale yellow powder, 65.6 %). <sup>1</sup>H NMR (400 MHz, D<sub>2</sub>O): δ 8.52 (s, 4H), 5.13 (dd, *J* = 34.3, 14.5 Hz, 6H), 4.97 (d, *J* = 3.2 Hz, 2H), 4.71 (s, 2H), 4.64 (s, 4H), 4.30 – 3.47 (m, 56H), 3.34 (d, *J* = 9.8 Hz, 6H), 3.22 (s, 4H), 2.80 (s, 2H), 2.13 (s, 2H). <sup>13</sup>C NMR (101 MHz, D<sub>2</sub>O) δ 163.46, 131.87, 125.44, 125.42, 101.98, 101.53, 101.48, 101.24, 101.17, 101.08, 83.95, 81.20, 81.11, 80.77, 80.49, 73.41, 73.33, 73.15, 73.12, 73.06, 72.91, 72.06, 71.97, 71.88, 71.76, 71.64, 71.57, 71.46, 71.18, 68.99, 60.65, 60.47, 60.05, 59.73, 58.85, 41.50. MALDI-TOF MS *m/z*: [M+Na]<sup>+</sup> calculated for [C<sub>86</sub>H<sub>122</sub>N<sub>2</sub>NaO<sub>62</sub>]<sup>+</sup>, 2197.6347; found, 2197.6344

**4b** : (Pale yellow powder, 2.3 g, Yield: 70.8 %). <sup>1</sup>H NMR (400 MHz, D<sub>2</sub>O): δ 8.56 (s, 4H), 5.25 – 4.94 (m, 12H), 4.72 – 4.61 (m, 4H), 4.19 – 3.42 (m, 69H), 3.39 – 3.25 (m, 7H), 3.16 (t, *J* = 8.9 Hz, 2H), 2.78 (s, 2H), 2.35 (d, *J* = 10.8 Hz, 2H). <sup>13</sup>C NMR (101 MHz, D<sub>2</sub>O) δ 163.75, 131.70, 125.72, 125.58, 102.46, 101.93, 101.87, 101.82, 101.66, 101.61, 101.36, 84.14, 81.11, 81.08, 81.07, 80.72, 80.71, 80.58, 73.07, 72.98, 72.94, 72.78, 72.56, 72.23, 72.12, 72.04, 71.92, 71.86, 71.81, 71.74, 71.64, 71.61, 71.09, 69.10, 60.42, 60.36, 60.03, 59.75, 59.73, 59.26, 41.49. MALDI-TOF MS *m/z*: [M+Na]<sup>+</sup> calcd for [C<sub>98</sub>H<sub>142</sub>N<sub>2</sub>NaO<sub>72</sub>]<sup>+</sup>, 2522.7437; found, 2522.7438

**4c** : (Light yellow powder, Yield: 62.9%). <sup>1</sup>H NMR (400 MHz, D<sub>2</sub>O): δ 8.56 (s, 4H), 5.30 – 4.93 (m, 16H), 4.62 (s, 3H), 4.22 – 3.41 (m, 79H), 3.39 – 3.21 (m, 8H), 3.13 (s, 2H), 2.72 (s, 2H), 2.44 (s, 2H). <sup>13</sup>C NMR (101 MHz, D<sub>2</sub>O) δ 163.68, 131.78, 125.52, 125.49, 101.66, 101.59, 101.57, 101.53, 101.40, 101.38, 101.28, 101.20, 83.60, 80.68, 80.46, 80.36, 80.21, 80.05, 79.78, 72.93, 72.78, 72.21, 71.79, 71.71, 69.00, 60.32, 60.26, 60.19, 59.96, 59.82, 59.48, 59.46, 41.38. MALDI-TOF MS *m/z*: [M+Na]<sup>+</sup> calcd for [C<sub>110</sub>H<sub>162</sub>N<sub>2</sub>NaO<sub>82</sub>]<sup>+</sup>, 2846.8494; found, 2846.8491

#### Synthesis of compound DHNDI:

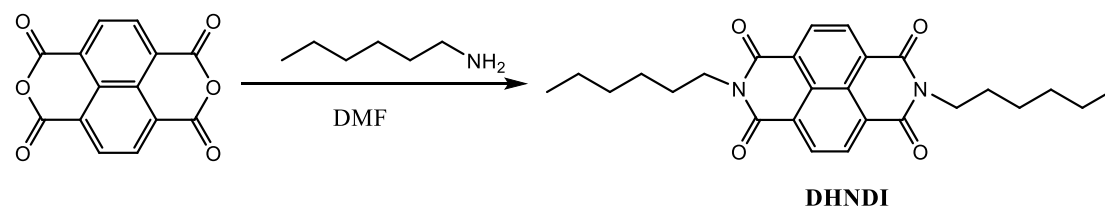

For comparison, **DHNDI** was synthesized from commercially available samples. Thus, 1,4,5,8-naphthalene-tetracarboxylic dianhydride (600 mg, 2.2 mmol) and n-hexylamine (3.0 mL, 22.4 mmol) were dissolved in anhydrous DMF (50 mL) in a round bottom flask. After the addition of  $K_2CO_3$  (250 mg), the mixture was stirred for 6 h at 95 °C. DMF and hexylamine were then removed under reduced pressure, and the residue was dissolved in 30 mL DCM, which was purified by a chromatographic column to afford the pale brown solid **DHNDI** in 55 % yield.  $^1H$  NMR (400 MHz,  $CDCl_3$ )  $\delta$  8.76 (s, 4H), 4.24 – 4.15 (m, 4H), 1.74 (dt,  $J$  = 15.3, 7.5 Hz, 4H), 1.48 – 1.40 (m, 4H), 1.39 – 1.29 (m, 8H), 0.90 (t,  $J$  = 7.1 Hz, 6H).  $^{13}C$  NMR (101 MHz,  $CDCl_3$ )  $\delta$  163.00, 131.02, 126.91, 41.10, 31.65, 28.21, 26.89, 22.75, 14.19. HRMS (ESI)  $m/z$ :  $[M+H]^+$  calcd for  $[C_{26}H_{31}N_2O_4]^+$ , 435.2278; found, 435.2280.

### Synthesis of axle molecules:

#### Axle-1:

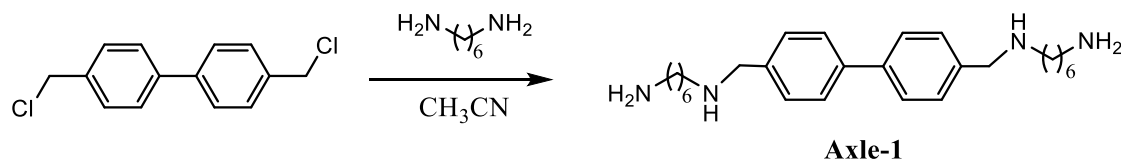

4, 4'-bis(chloromethyl)biphenyl (500 mg, 2.0 mmol), and hexanediamine (2.3 g, 19.8 mmol) were dissolved in dry  $CH_3CN$  (40 mL), and the solution was heated at 70 °C for 24 h. After the solvent was removed under vacuum by rotary evaporators, the resultant precipitate was dissolved in an HCl aqueous solution, which was further collected and purified on a C18 reversed-phase chromatographic column to give a white solid **Axle-1** (492 mg, yield: 60.3%).  $^1H$  NMR (400 MHz,  $D_2O$ )  $\delta$  7.68 (d,  $J$  = 8.3 Hz, 4H), 7.47 (d,  $J$  = 8.3 Hz, 4H), 4.18 (s, 4H), 3.03 – 2.95 (m, 4H), 2.87 (t,  $J$  = 7.6 Hz, 4H), 1.66 – 1.51 (m, 8H), 1.30 (m, 8H).  $^{13}C$  NMR (101 MHz,  $D_2O$ )  $\delta$  140.79, 130.46, 130.35, 127.66, 50.50, 46.93, 39.29, 26.44, 25.24, 25.07. HRMS (ESI)  $m/z$ :  $[M+H]^+$  calcd for  $[C_{26}H_{43}N_4]^+$ , 411.3482; found, 411.3462

#### Axle-2:

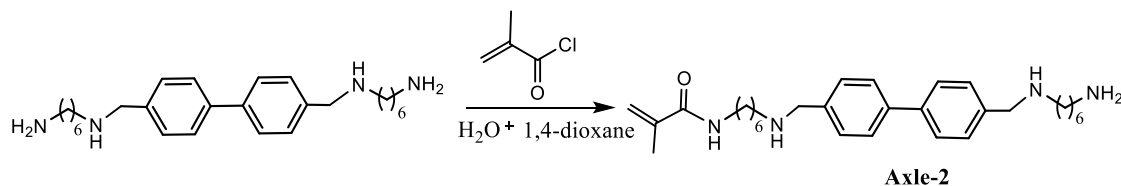

A solution of **Axle-1** (500 mg, 1.2 mmol) in  $H_2O$  (50 mL) containing a certain amount of  $NaHCO_3$  (pH 8.5) was stirred at 0 °C for 30 minutes. Methacryloyl chloride (130  $\mu$ L, 1.3 mmol) and triethylamine (203  $\mu$ L) in 1,4-dioxane (60 mL) were dropwise added to the above mixture in an ice bath. The mixture was then allowed to react for 1 h at 0 °C and 20 h at the ambient temperature. When the organic solvent was evaporated under reduced pressure, the residue was purified by a C18 reversed-phase chromatographic column with ultra-pure water to give the **Axle-2** as a white solid in 17.1% yield.  $^1H$  NMR (400 MHz,  $D_2O$ )  $\delta$  7.78 (d,  $J$  = 8.2 Hz, 4H), 7.57 (d,  $J$  = 8.2 Hz,

4H), 5.61 (s, 1H), 5.38 (s, 1H), 4.27 (s, 4H), 3.21 (t,  $J = 6.9$  Hz, 2H), 3.07 (dd,  $J = 15.9$ , 9.9 Hz, 4H), 2.97 (t,  $J = 7.6$  Hz, 2H), 1.88 (s, 3H), 1.76 – 1.60 (m, 6H), 1.56 – 1.47 (m, 2H), 1.44 – 1.29 (m, 8H).  $^{13}\text{C}$  NMR (101 MHz,  $\text{D}_2\text{O}$ )  $\delta$  163.03, 162.67, 140.83, 139.21, 130.43, 127.66, 120.57, 117.69, 114.80, 50.44, 46.83, 39.24, 32.56, 27.96, 26.44, 25.20, 17.62. HRMS (ESI)  $m/z$ :  $[\text{M}+\text{H}]^+$  calcd for  $[\text{C}_{29}\text{H}_{45}\text{N}_4\text{O}]^+$ , 479.3744; found, 479.374

### Synthesis of the SPH:

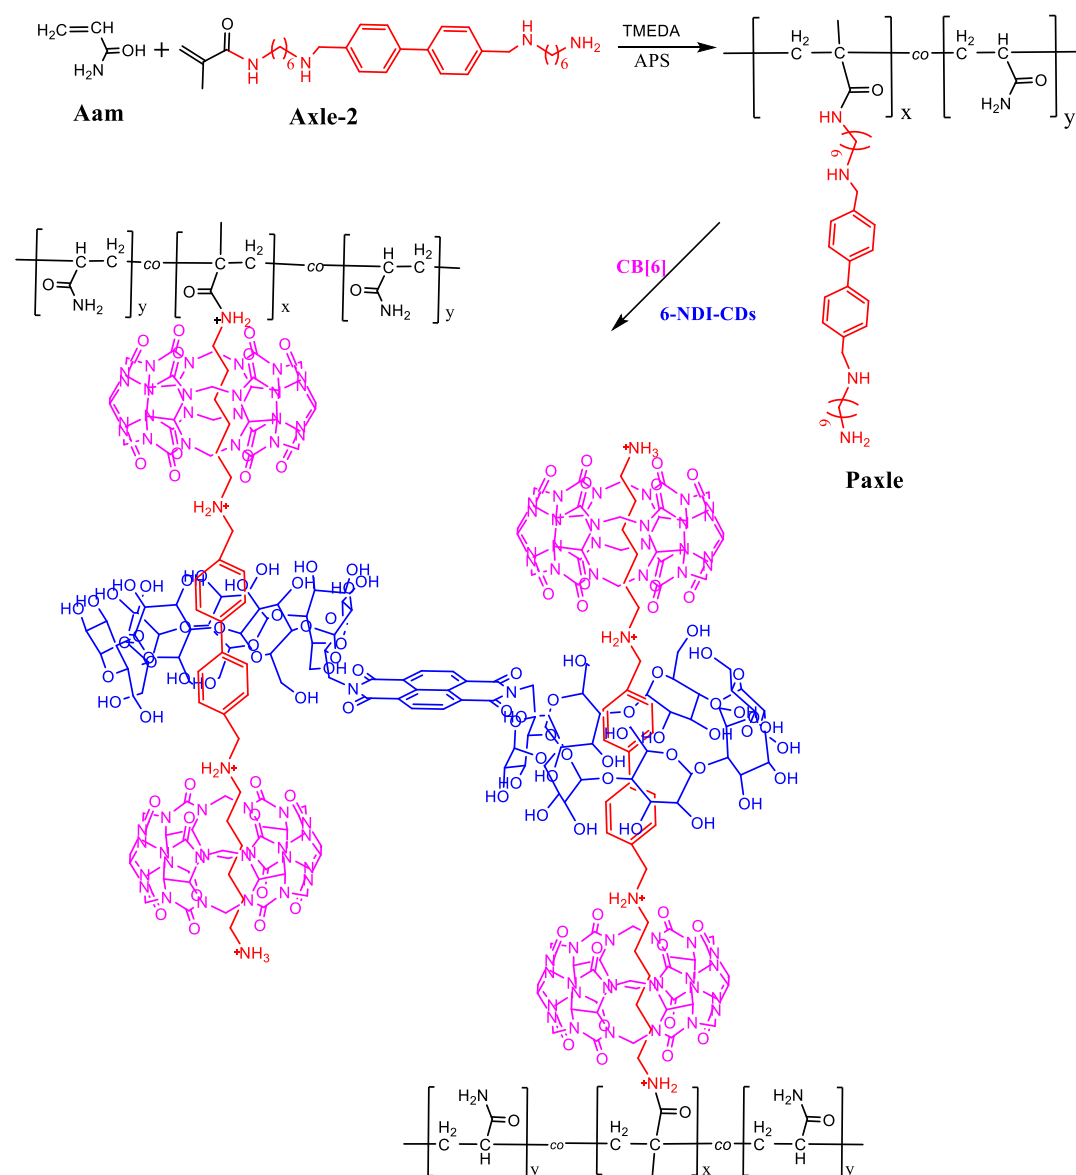

**Scheme S2.** The formation of the SPH

The hydrogel was prepared by co-polymerizing **Axle-2**/acrylamide mixtures and forming a pseudorotaxane composite structure by adding CB[6] and NDI-CD-dimer (6-NDI-CDs). Thus, acrylamide monomers and **Axle-2** were mixed in the deionized water and stirred to give a homogenous solution. Subsequently, as a redox initiation system,

ammonium peroxodisulphate/N, N, N, N'-tetramethylethylene-diamine (APS/TMEDA), was added in the **Axle-2**/acrylamide mixtures to form the co-polymer **Paxle** which made the solution viscous. After the addition of CB[6] and NDI-CD-dimer (6-NDI-CDs), the solid was gradually dissolved under the heated condition. The mixture was placed at 70 °C for 30 min, then transferred to different molds, and stood at room temperature until the viscous solution was coagulated to form a final hydrogel (SPH).

### 3. NMR and HRMS spectra of compounds

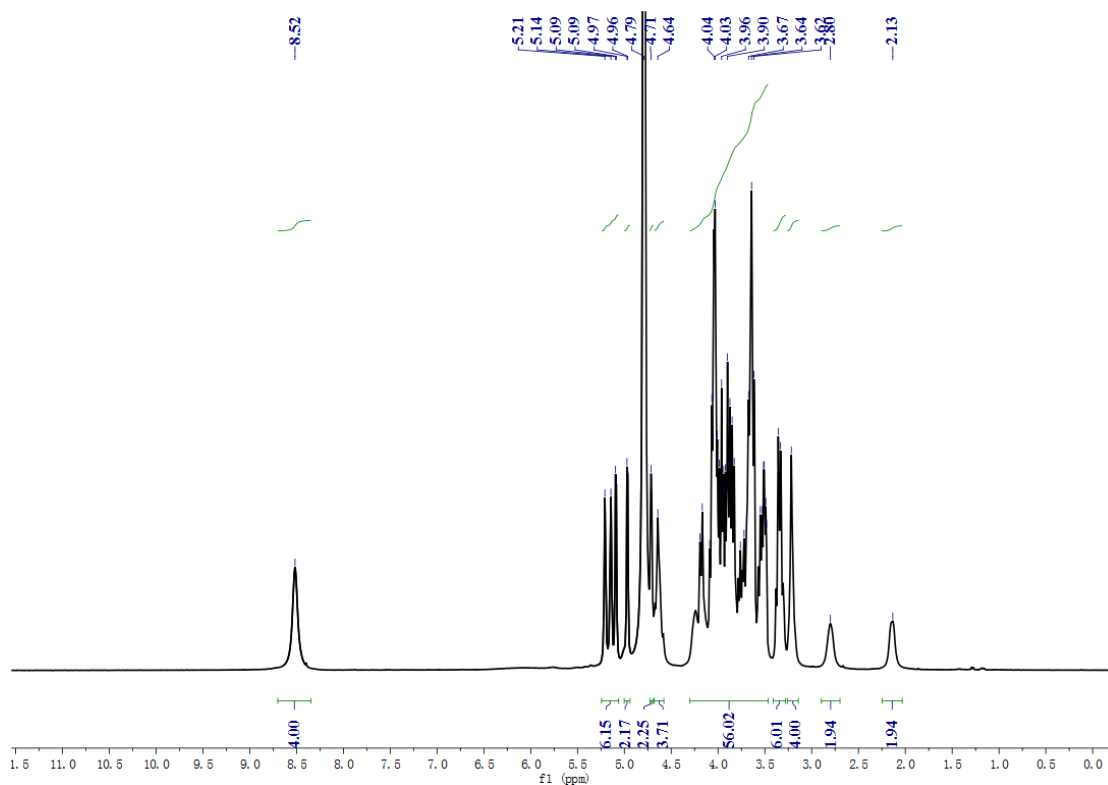

**Fig. S1** <sup>1</sup>H NMR spectrum (400 MHz, D<sub>2</sub>O) of **4a** (6-NDI- $\alpha$ -CD)

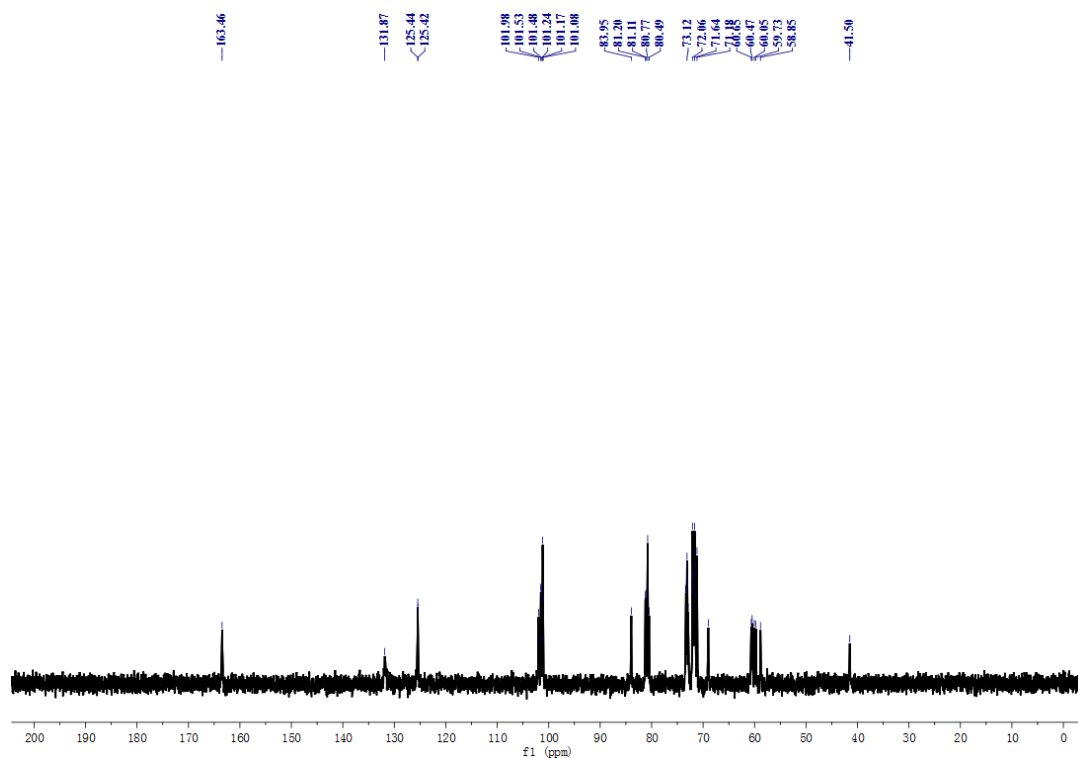

**Fig. S2**  $^{13}\text{C}$  NMR spectrum (101 MHz,  $\text{D}_2\text{O}$ ) of **4a** (6-NDI- $\alpha$ -CD)

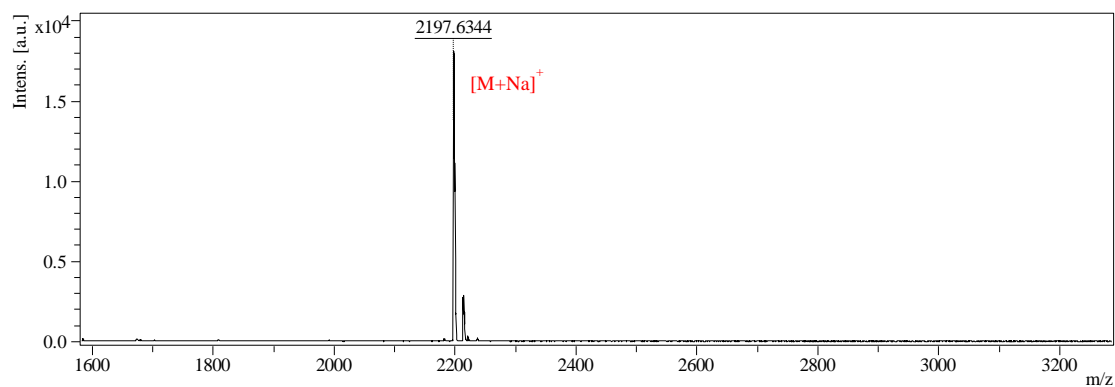

**Fig. S3** MALDI-TOF mass spectrum of **4a** (6-NDI- $\alpha$ -CD)

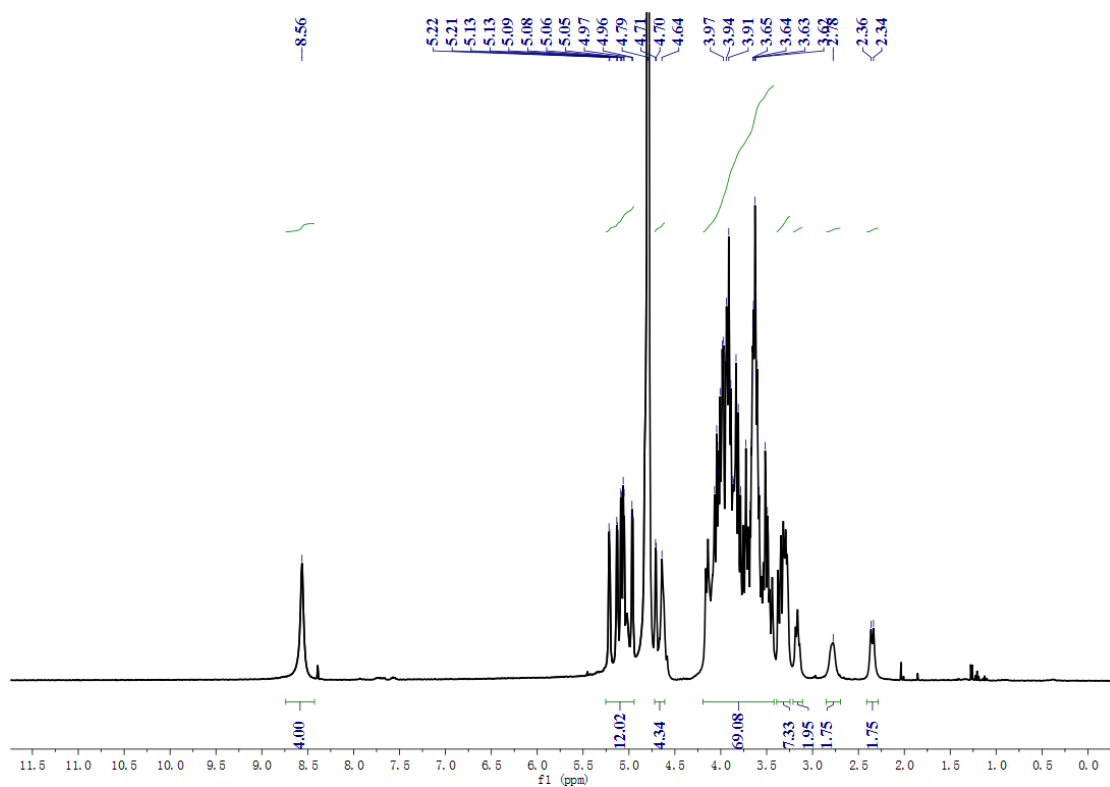

**Fig. S4**  $^1\text{H}$  NMR spectrum (400 MHz,  $\text{D}_2\text{O}$ ) of **4b** (6-NDI- $\beta$ -CD)

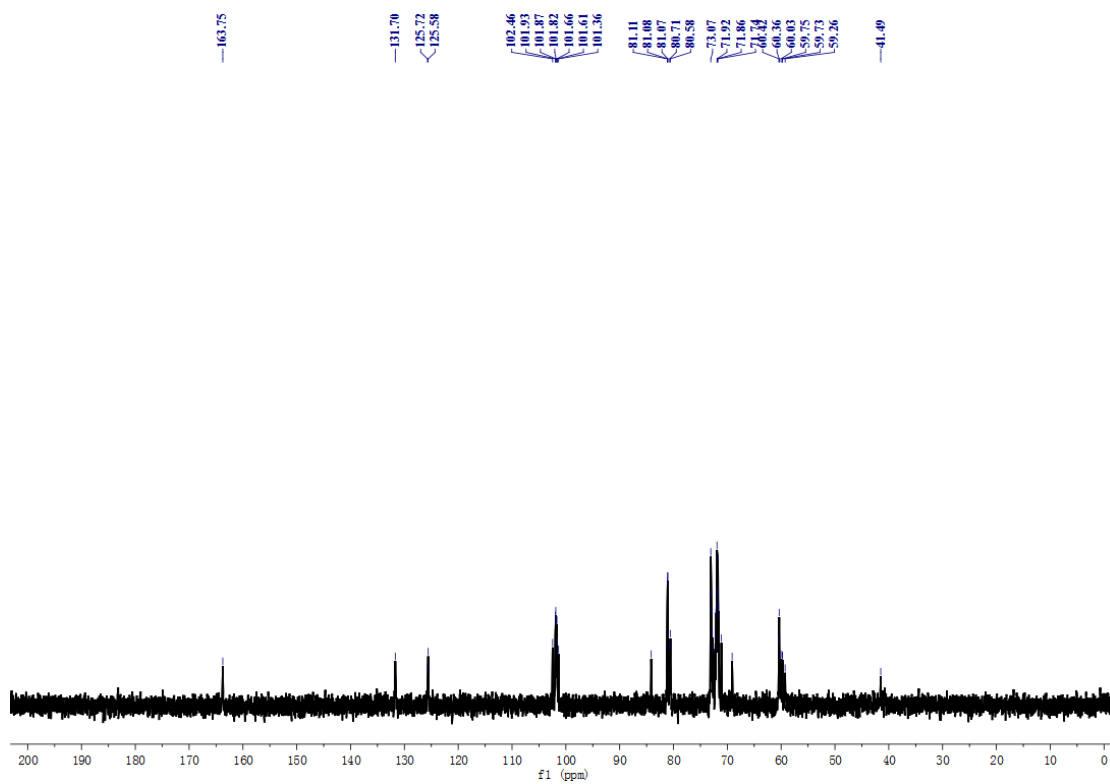

**Fig. S5**  $^{13}\text{C}$  NMR spectrum (101 MHz,  $\text{D}_2\text{O}$ ) of **4b** (6-NDI- $\beta$ -CD)

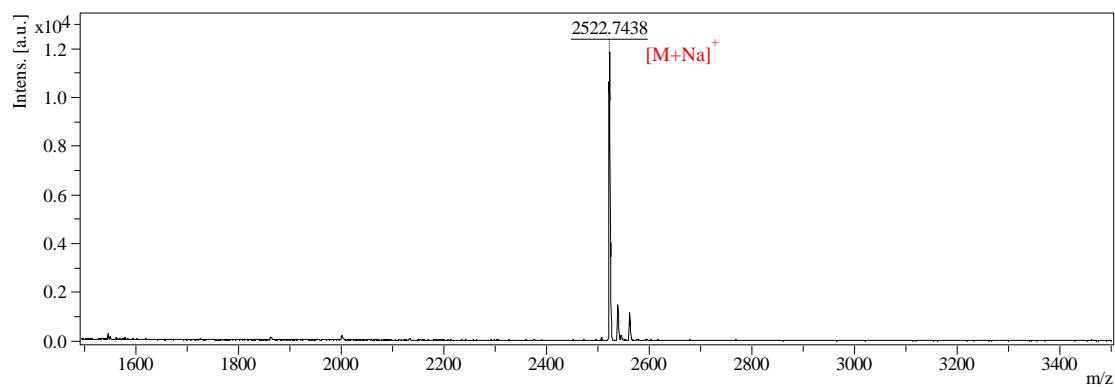

**Fig. S6** MALDI-TOF mass spectrum of **4b** (6-NDI- $\beta$ -CD)

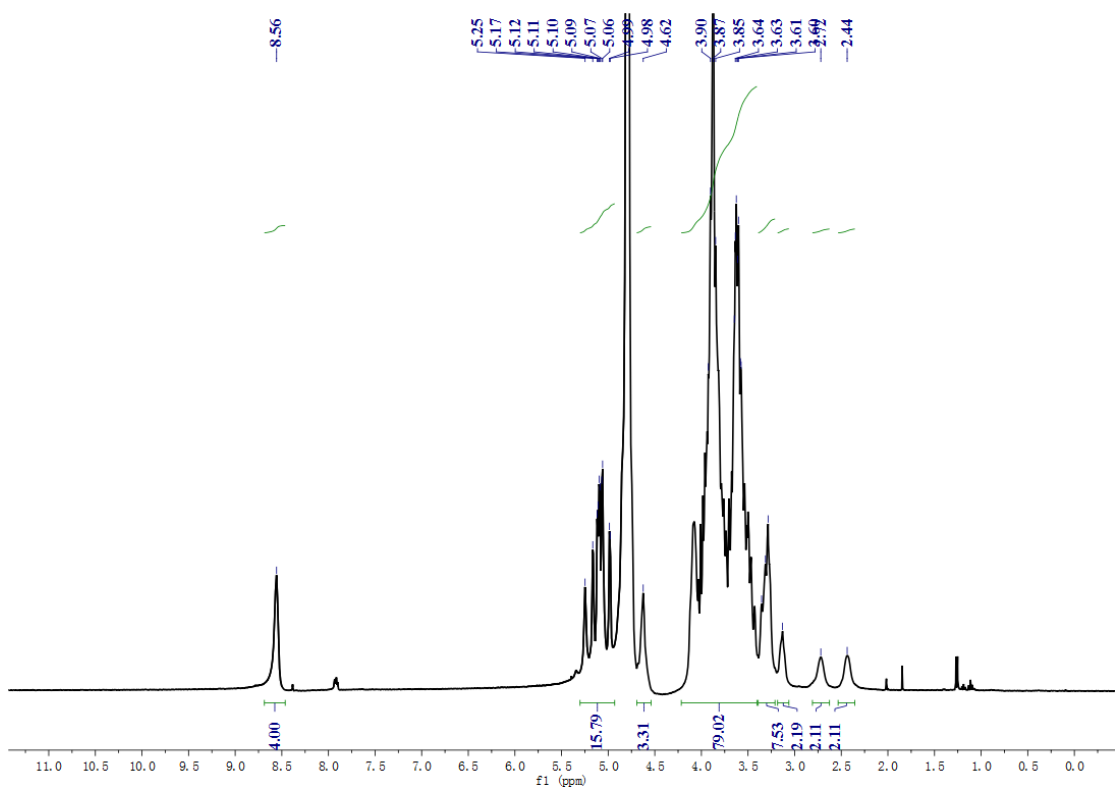

**Fig. S7**  $^1\text{H}$  NMR spectrum (400 MHz,  $\text{D}_2\text{O}$ ) of **4c** (6-NDI- $\gamma$ -CD)

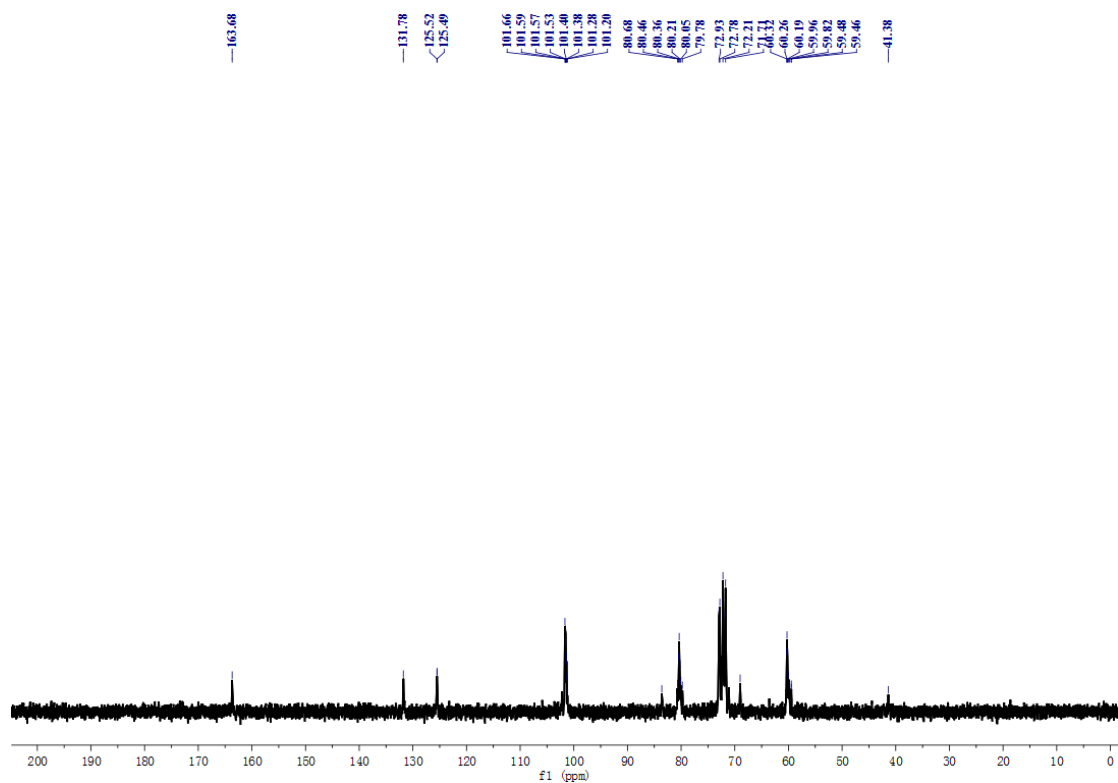

**Fig. S8**  $^{13}\text{C}$  NMR spectrum (101 MHz,  $\text{D}_2\text{O}$ ) of **4c** (6-NDI- $\gamma$ -CD)

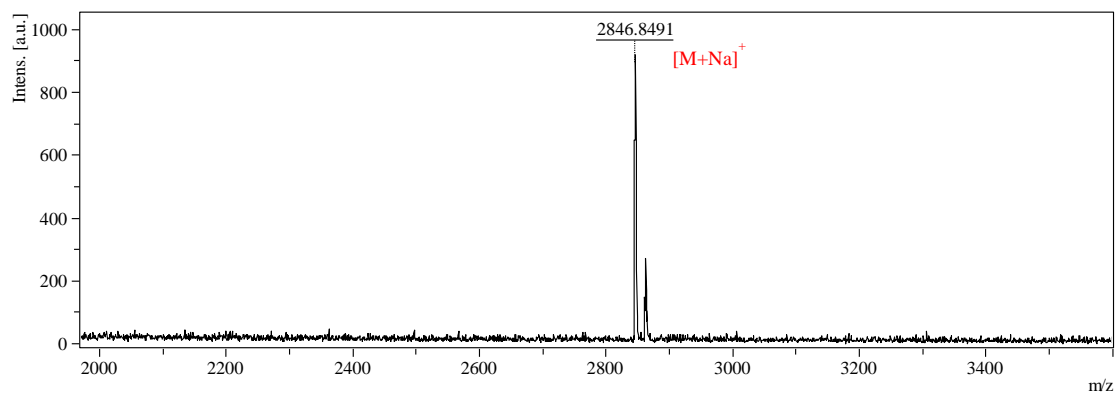

**Fig. S9** MALDI-TOF mass spectrum of **4c** (6-NDI- $\gamma$ -CD)

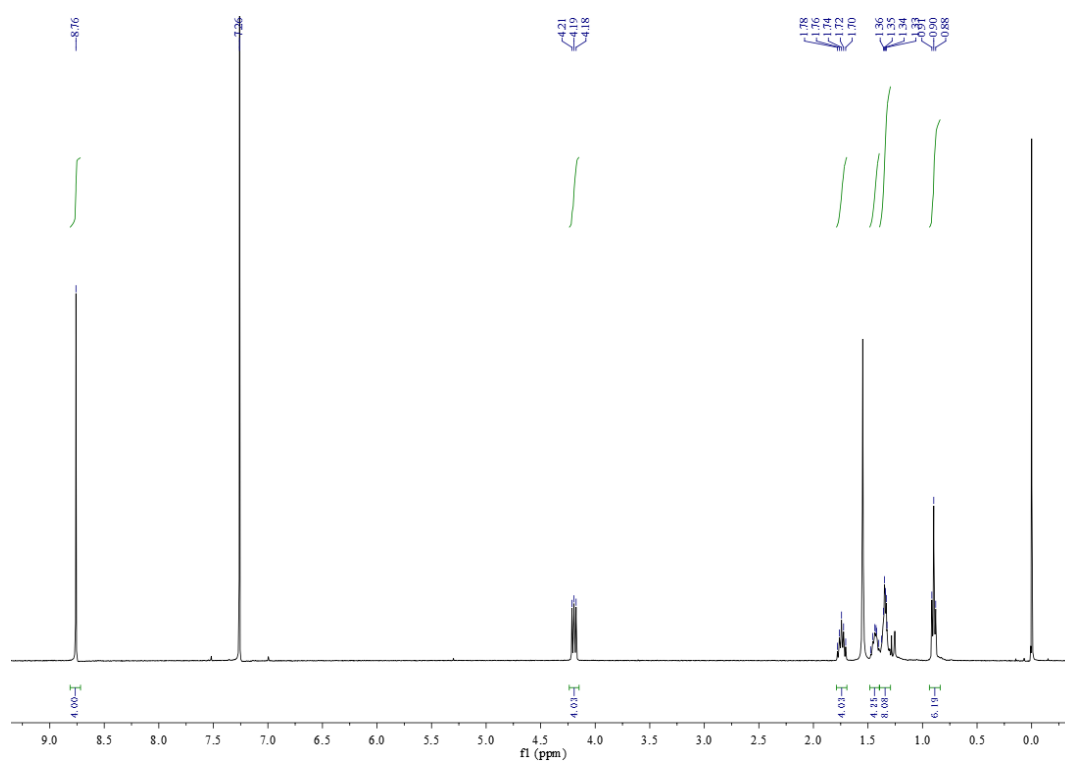

**Fig. S10** <sup>1</sup>H NMR spectrum (400 MHz, CDCl<sub>3</sub>, room temperature) of sample DHNDI

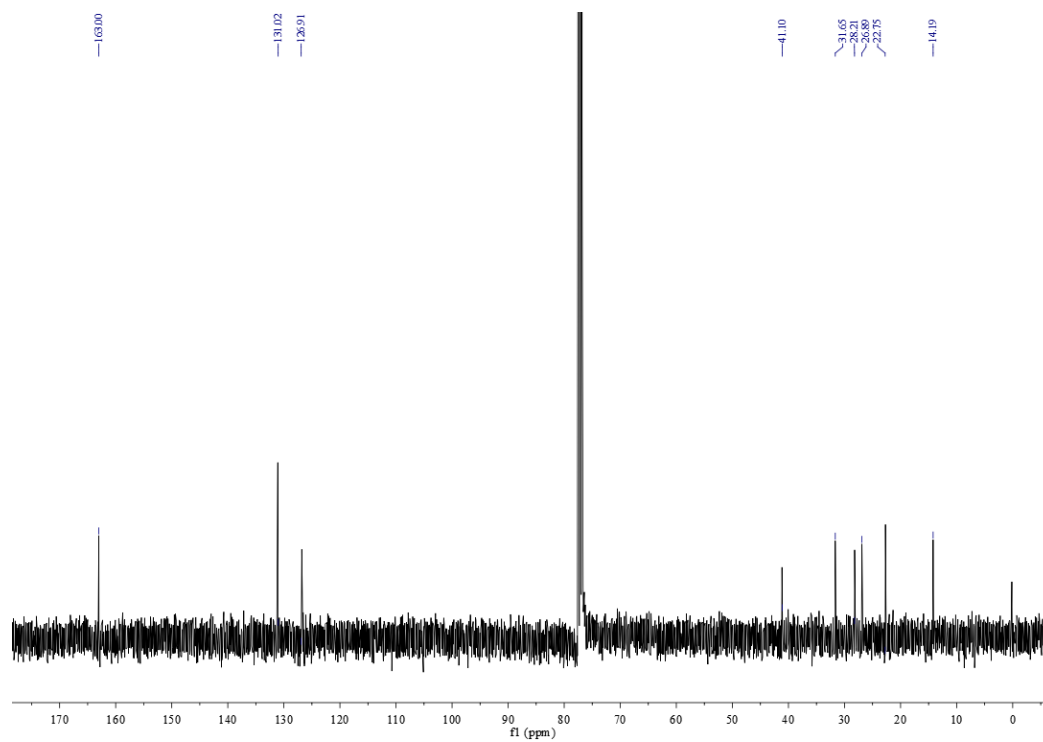

**Fig. S11** <sup>13</sup>C NMR spectrum (101 MHz, CDCl<sub>3</sub>) of DHNDI

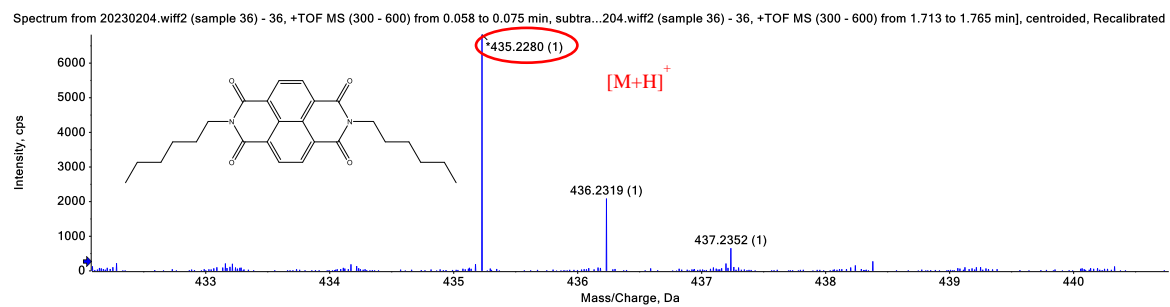

**Fig. S12** HRMS spectrum of **DHNDI**

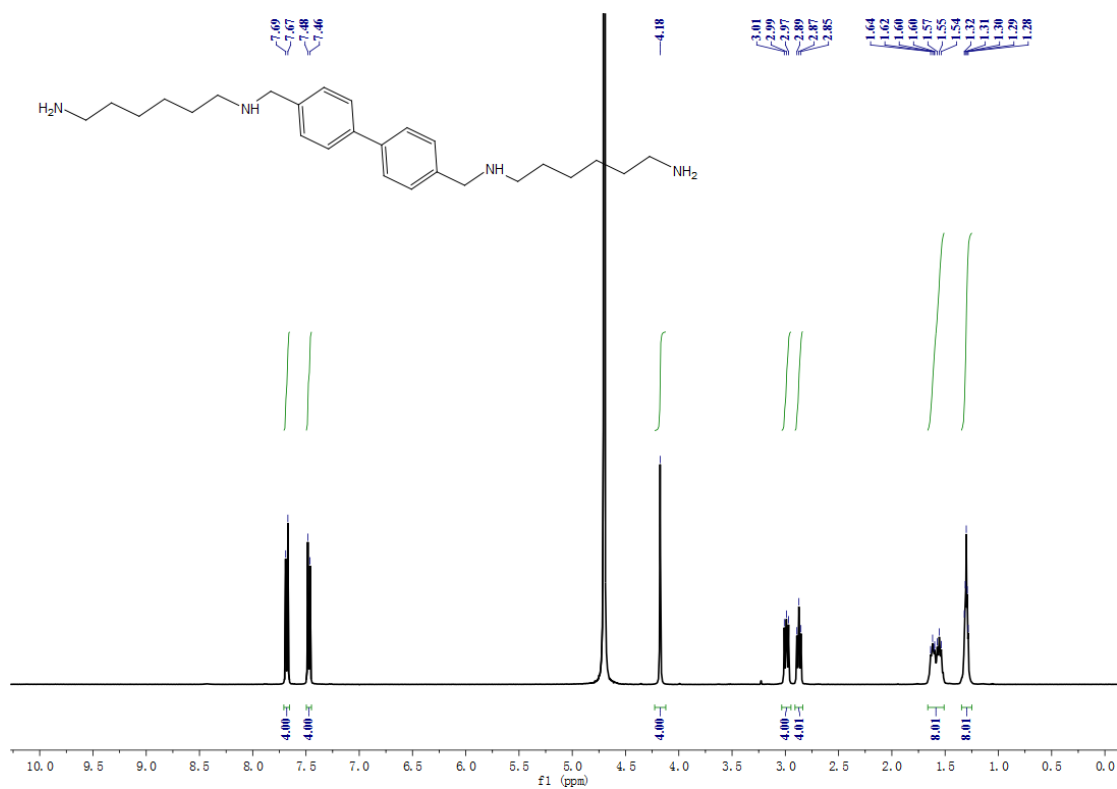

**Fig. S13**  $^1\text{H}$  NMR spectrum (400 MHz,  $\text{D}_2\text{O}$ ) of **Axle-1**

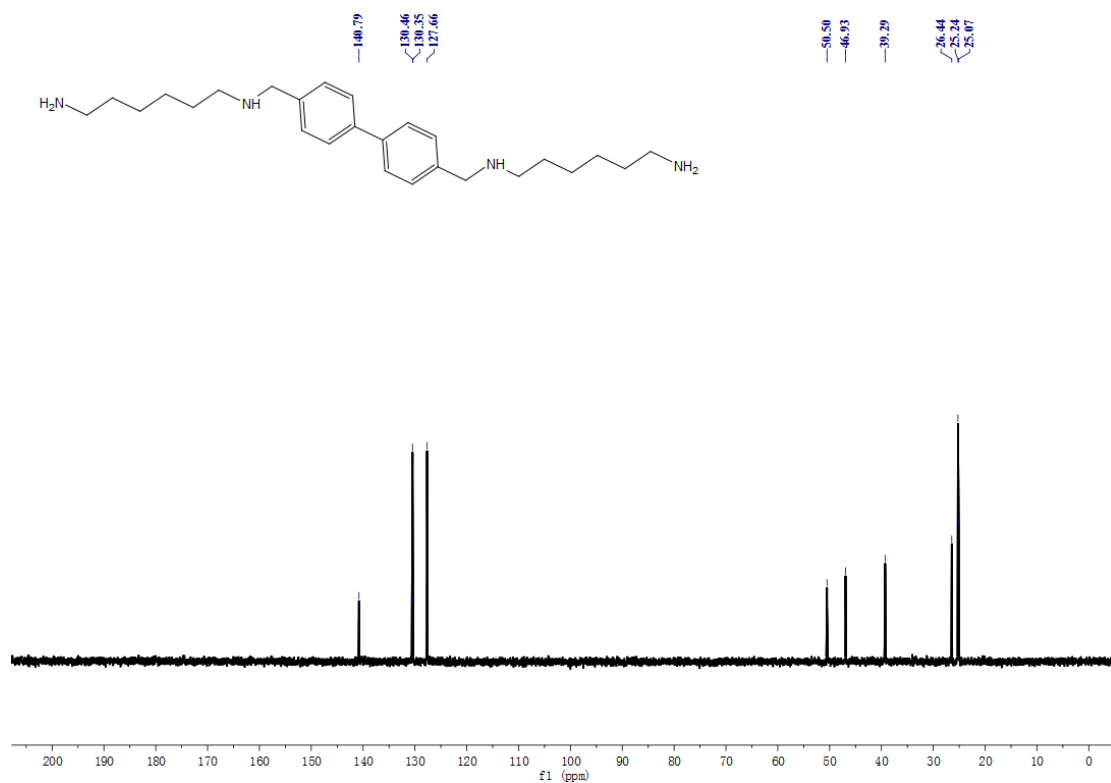

**Fig. S14** <sup>13</sup>C NMR spectrum (101 MHz, D<sub>2</sub>O) of Axle-1

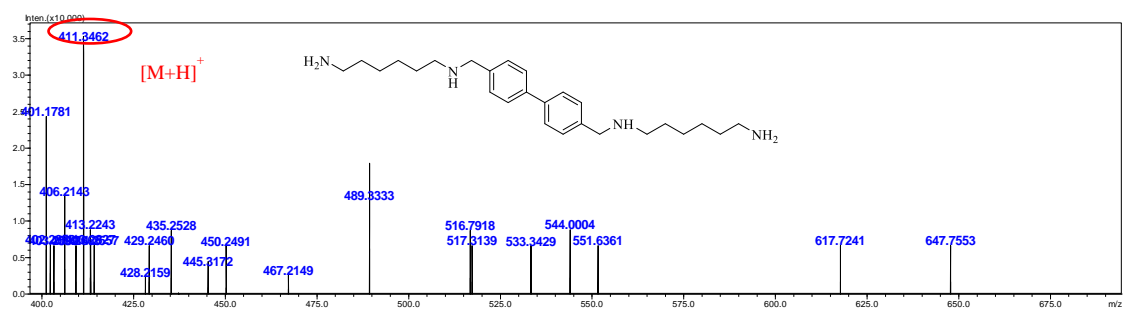

**Fig. S15** HRMS spectrum of Axle-1

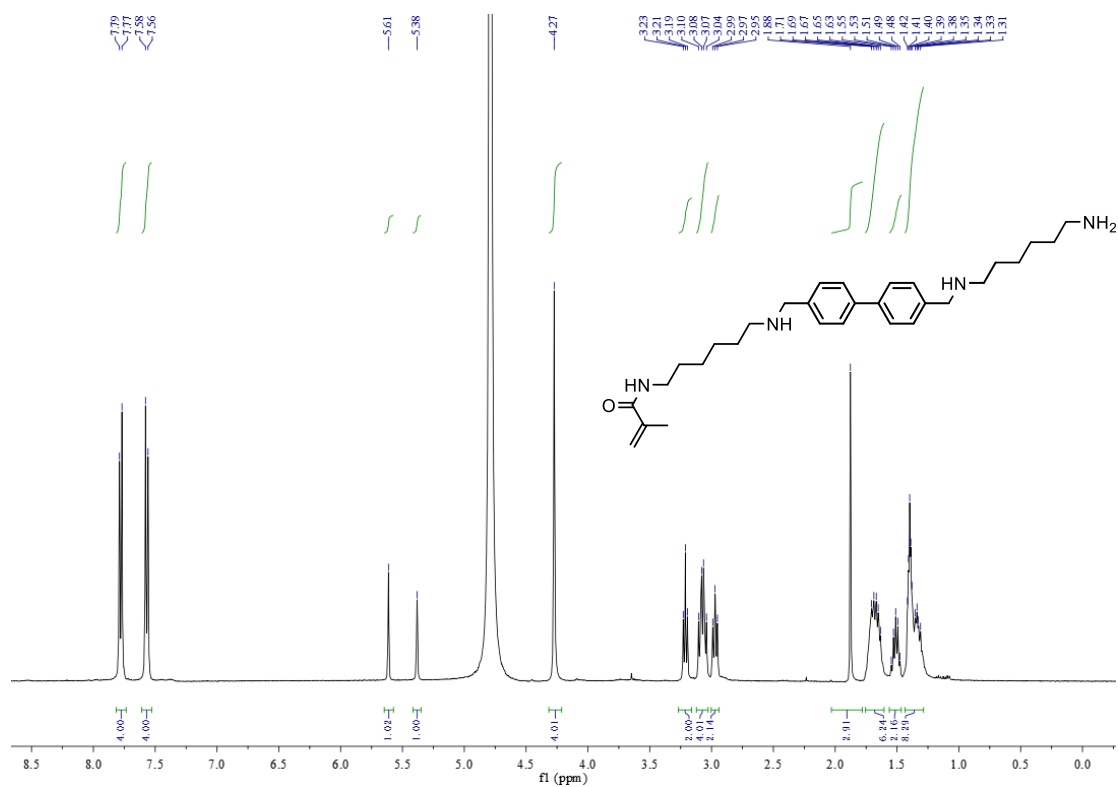

**Fig. S16** <sup>1</sup>H NMR spectrum (400 MHz, D<sub>2</sub>O, room temperature) of sample Axle-2

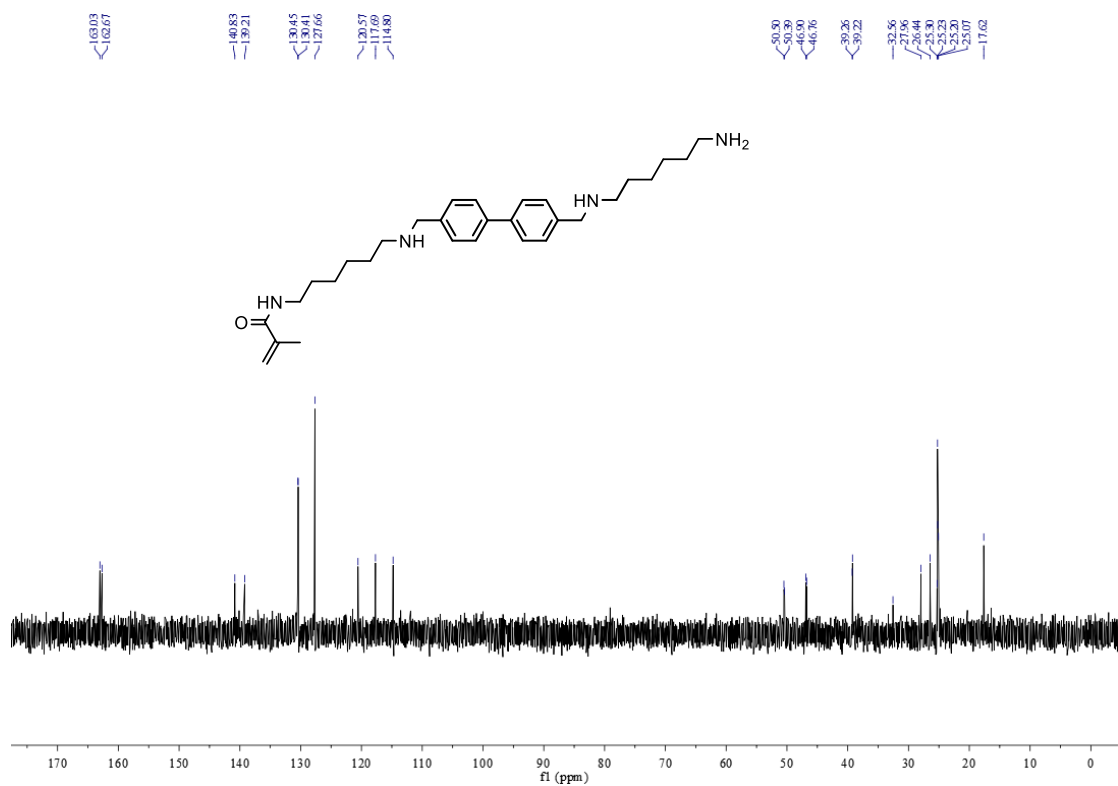

**Fig. S17** <sup>13</sup>C NMR spectrum (101 MHz, D<sub>2</sub>O) of Axle-2

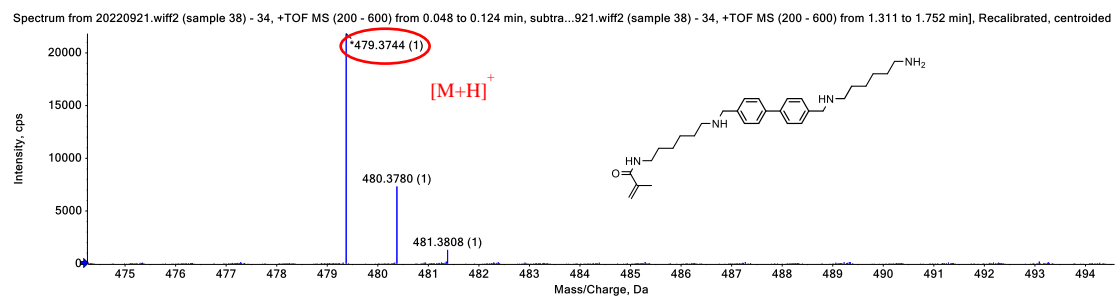

Fig. S18 HRMS spectrum of Axle-2

#### 4. Synthesis and Characterization of the other Pseudorotaxane structure formed by CB[6], 6-NDI- $\beta$ -CD and Axle-1

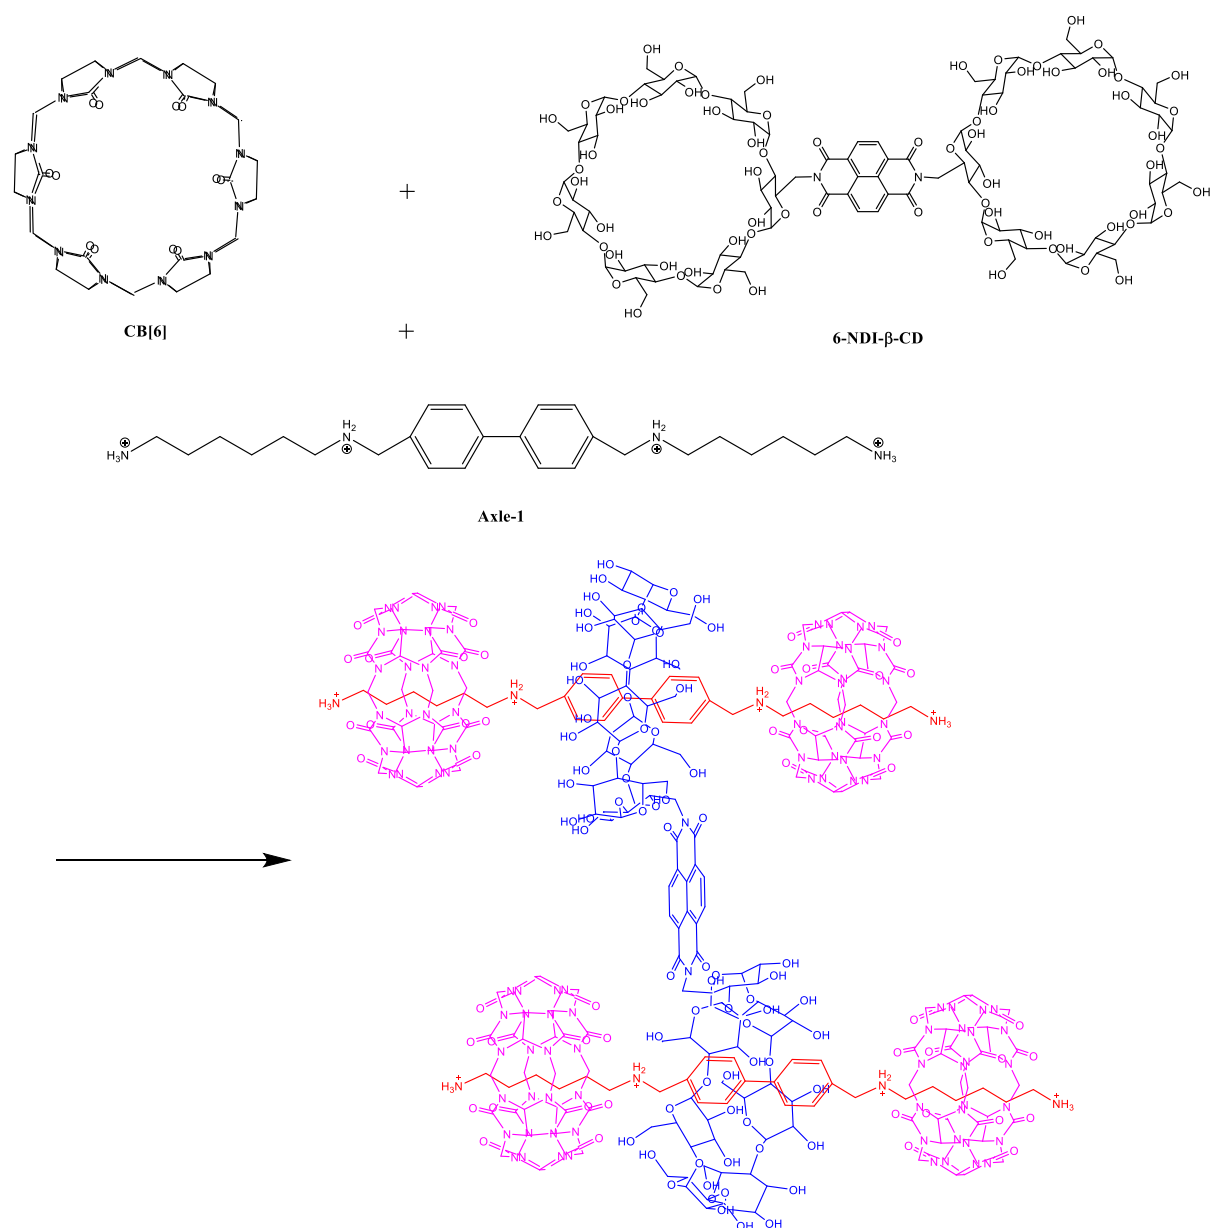

Scheme S3. The obtained pseudorotaxane structure mixed by CB[6], 6-NDI- $\beta$ -CD and Axle-1

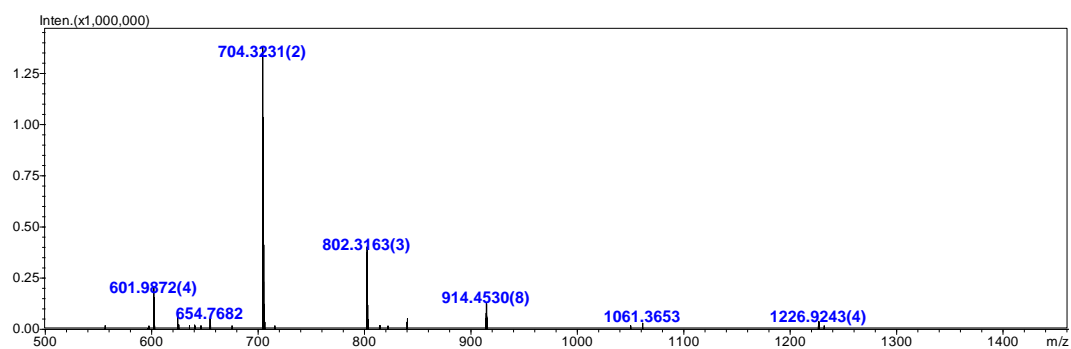

**Fig. S19** HRMS spectrum measured for the mixture containing CB[6], **Axle-1** and 6-NDI- $\beta$ -CD.

$[\text{CB}[6] + \text{Axle-1}]^{2+}$  calcd for:  $m/z = 704.3250$ , found:  $m/z = 704.3231$

$[2\text{CB}[6] + \text{Axle-1}]^{3+}$  calcd for:  $m/z = 802.3183$ , found:  $m/z = 802.3163$

$[2\text{CB}[6] + \text{Axle-1}]^{4+}$  calcd for:  $m/z = 601.9906$ , found:  $m/z = 601.9872$

$[2\text{CB}[6] + \text{Axle-1} + 6\text{-NDI-}\beta\text{-CD}]^{4+}$  calcd for:  $m/z = 1226.9292$ , found:  $m/z = 1226.9243$

$[4\text{CB}[6] + 2 \text{Axle-1} + 6\text{-NDI-}\beta\text{-CD}]^{8+}$  calcd for:  $m/z = 914.3345$ , found:  $m/z = 914.4530$

## 5. UV-vis spectra of 6-NDI-CDs

### The photo-induced reduction of 6-NDI-CDs in solution

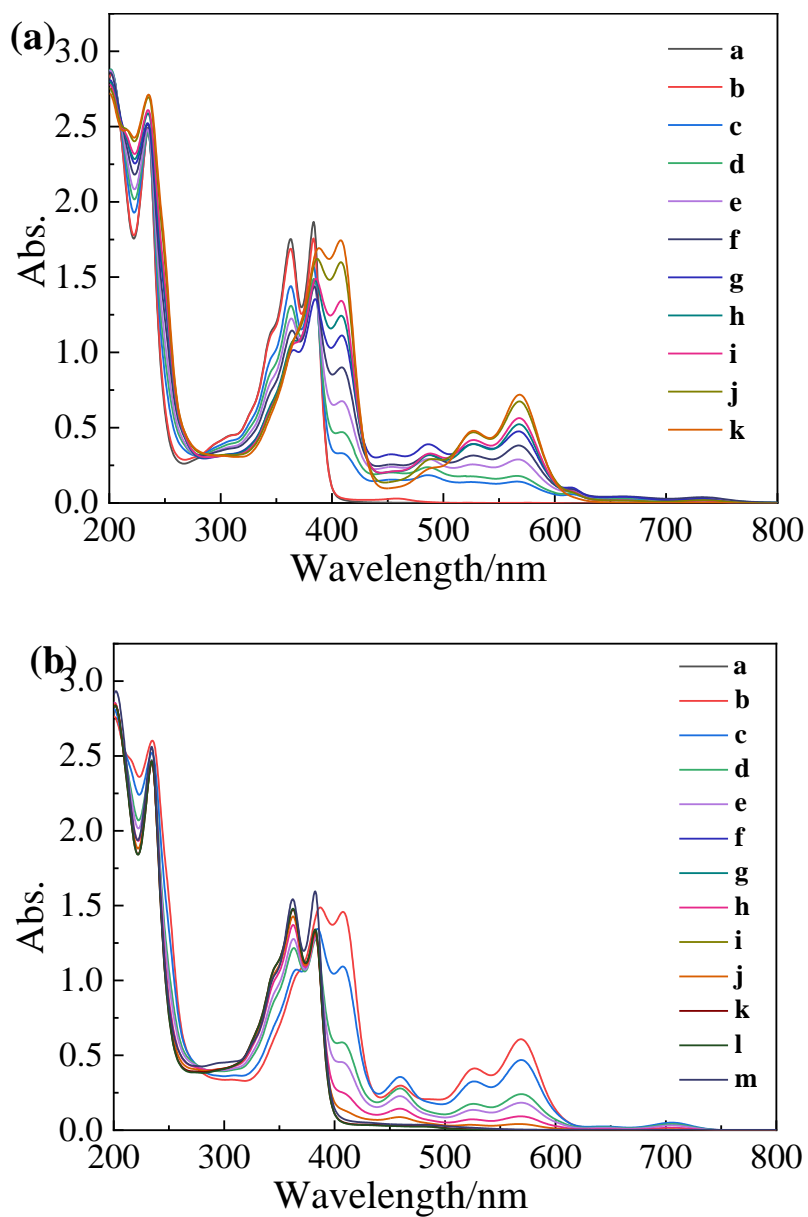

**Fig. S20** (a) UV-Vis spectral change of 0.1 mM 6-NDI- $\alpha$ -CD in aqueous solution upon photoirradiation at 20 °C. **a** is the unirradiated sample, **b~k** represents the spectral change upon photoirradiation with a 365 nm LED lamp. (b) UV-Vis spectral changes after exposing the photoirradiated 6-NDI- $\alpha$ -CD to the air at 20 °C. From **a** to **m** is the UV-Vis spectral change within two hours after the sample was exposed to air.

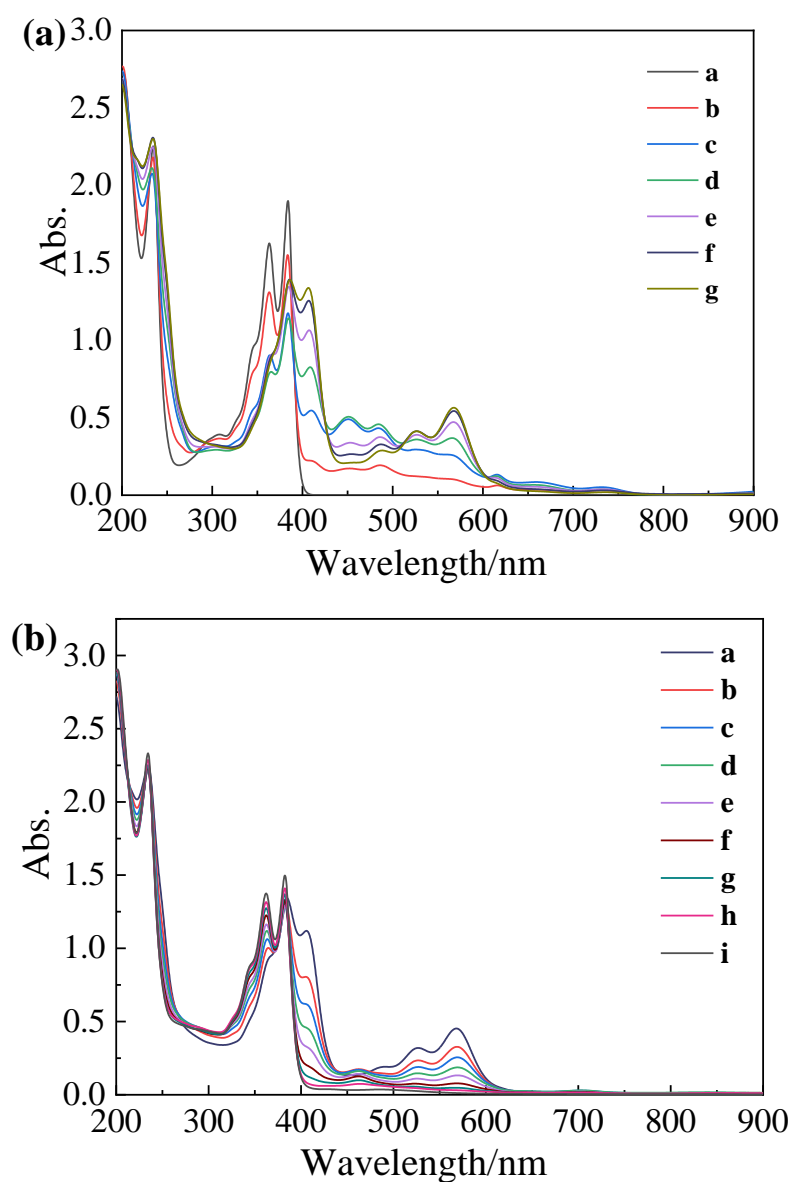

**Fig. S21** (a) UV-Vis spectral changes of 0.1 mM 6-NDI- $\gamma$ -CD in aqueous solution upon photoirradiation at 20 °C. **a** is the unirradiated sample, **b~g** represents the spectral change upon photoirradiation with a 365 nm LED lamp. (b) UV-Vis spectral changes after exposing the photoirradiated 6-NDI- $\gamma$ -CD to the air at 20 °C. From **a** to **i** is the UV-Vis spectral change within two hours after the sample was exposed to air.

### Photochromism of 6-NDI-CDs

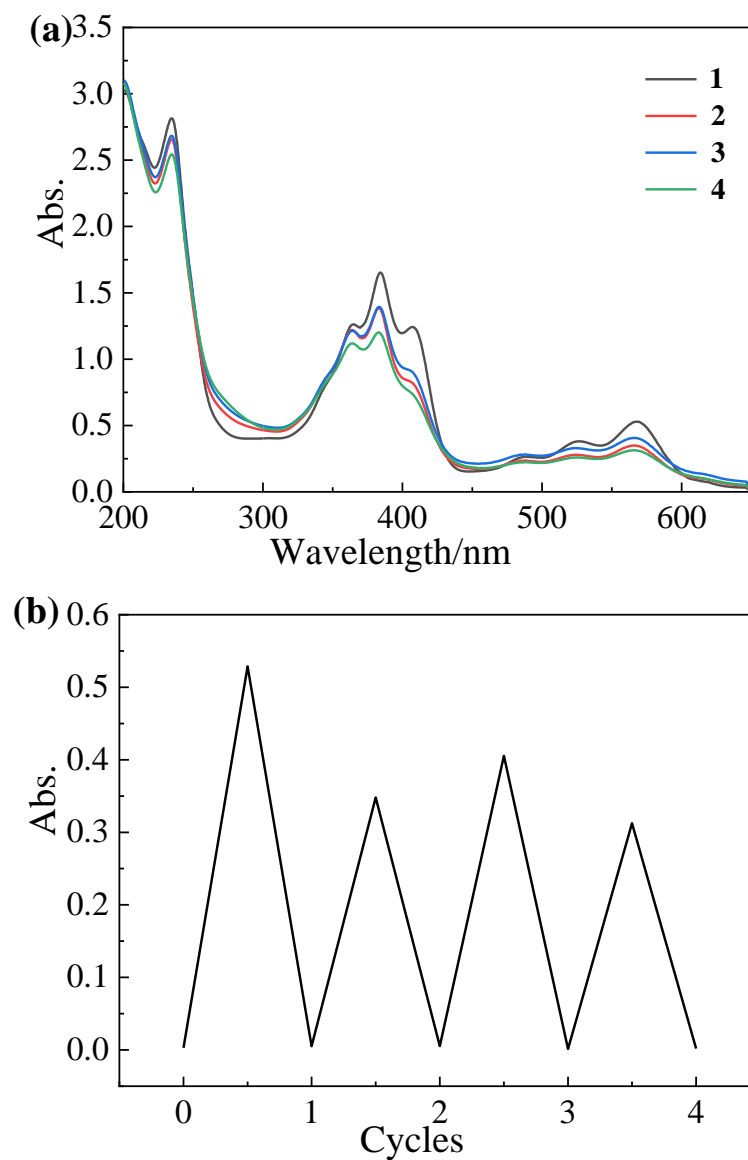

**Fig. S22** (a) UV-Vis absorption spectra of photoirradiated samples of 6-NDI-β-CD; (b) The plot of the absorption value at 567.5 nm versus the number of cycles for writing/erasing (n=1, 2, 3, 4)

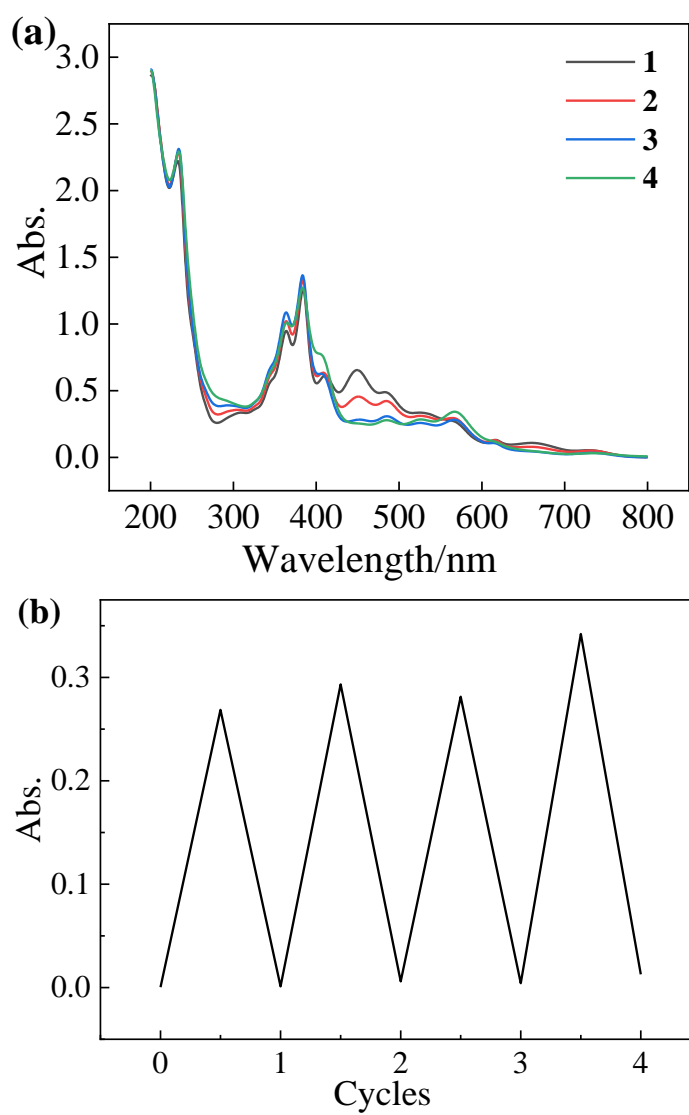

**Fig. S23** (a) UV-Vis absorption spectra of photoirradiated samples of 6-NDI- $\gamma$ -CD; (b) The plot of the absorption value at 567 nm versus the number of cycles for writing/erasing (n=1, 2, 3, 4)

## 6. Time-dependent CD spectral changes

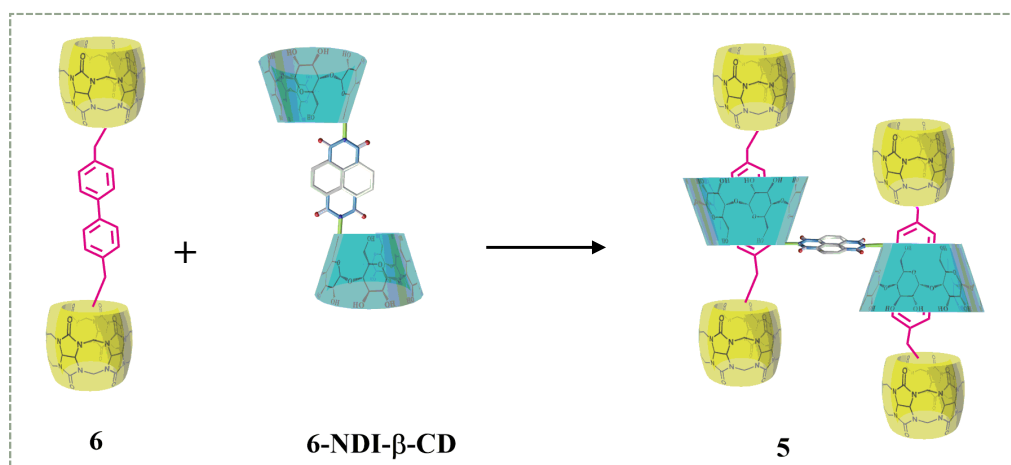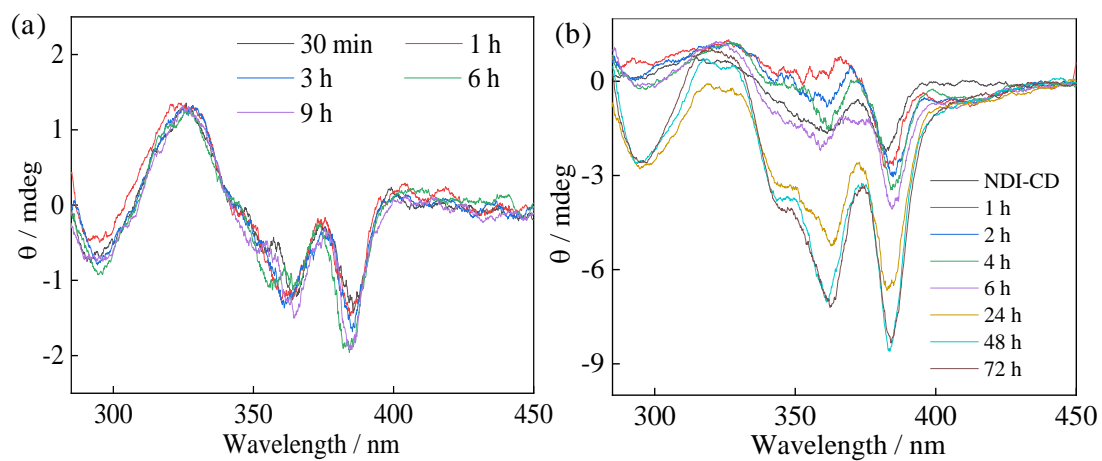

**Fig. S24** Time-dependent CD spectral changes upon addition of 6-NDI- $\beta$ -CD (0.1 mM) to the aqueous solution of (a) **Axle-1** (0.2 mM) and (b) the dumbbell-shaped complex **6** (0.2 mM) at 20 °C.

## 7. Properties investigations of the SPHs:

### Swelling Properties:

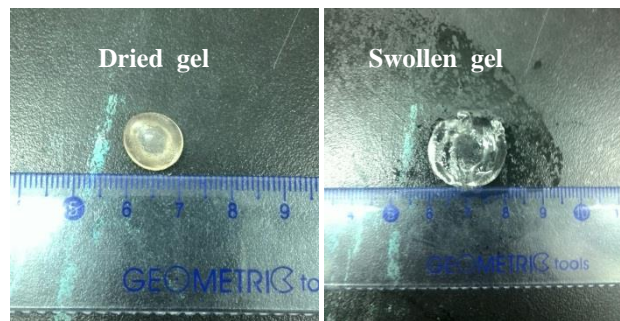

**Fig. S25** Photographs of the swelling experiment of gel before and after being soaked for two hour in water. Left: the dried gel; right: the water-swollen gel.

A swelling experiment for **SPH** was conducted at ambient temperature by soaking the dry gel to give swollen gel (**Fig. S25**), which presented a distinct swelling behavior in water. As shown in Table S1, after being soaked in water for 2 hr, the diameter of the gel increased from 10 mm to 20 mm, and the weight raised to 1.2417 g from 0.2287 g of the dry gel. The swelling property was calculated by swelling degree or swelling ratio ( $Q$ ) using the following equation:

$$Q = \frac{W_t - W_0}{W_0}$$

where  $W_t$  is the weight of the sample after swelling solution, and  $W_0$  is the weight of the dry sample. The swelling ratio value of **SPH** was determined to be 4.4.

**Table S1.** The weight and size of the dried gel before and after immersion for 2 hr in water

|                       | Weight (g) | Diameter (mm) | Swelling degree |
|-----------------------|------------|---------------|-----------------|
| The dried gel         | 0.2287     | 10            |                 |
| The water-swollen gel | 1.2417     | 20            | 4.4             |

### Transparency experiment:

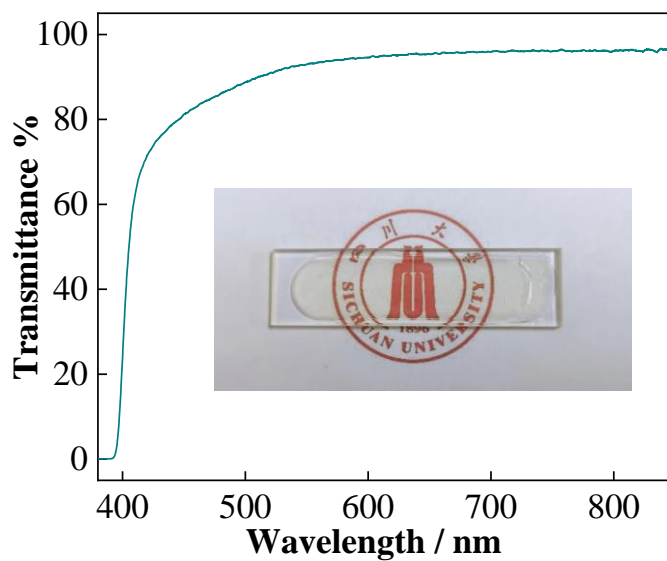

**Fig. S26** Optical transmittance of **SPH** in the wavelength range of 380 to 850 nm; inset: light transmission photographs of **SPH** (water content: 62 wt%; thickness: 1.5 mm)

### Stretching Properties:

**Table S2.** The parameters before and after stretching of **SPH** as well as at different time

|                        | Gel length (cm) | Stretching ratio (%) |
|------------------------|-----------------|----------------------|
| before stretching      | 2.5             | —                    |
| stretching             | 30              | 1100%                |
| 3 min after stretching | 4               | —                    |
| 6 hr after stretching  | 2.7             | —                    |

### Anti-shear ability:

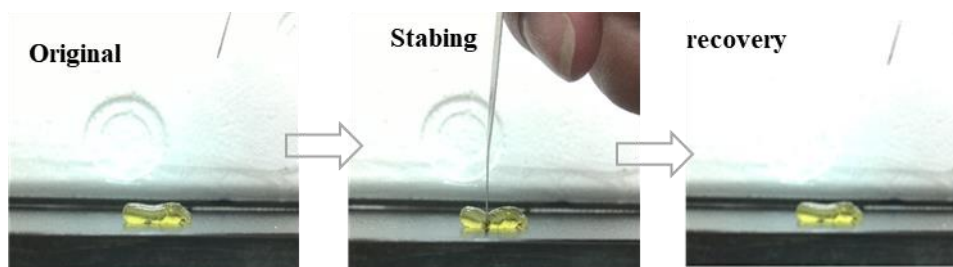

**Fig. S27** Images of **SPH** punctured by using a sharp needle and then rapid recovery without piercing.

## Mechanical properties:

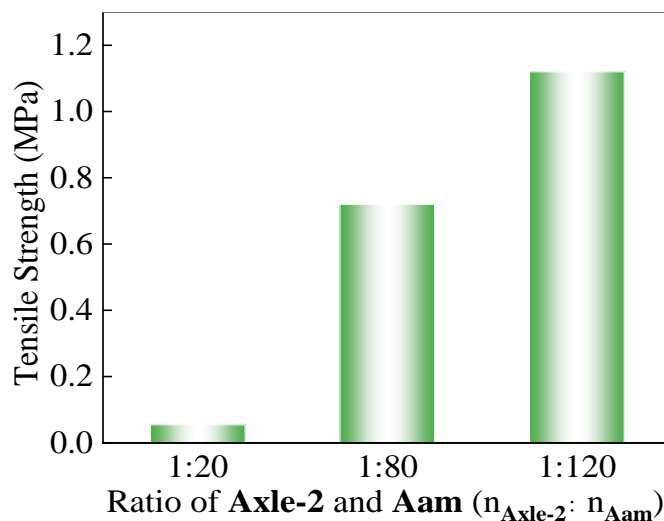

**Fig. S28** Tensile strength of **SPH** with different ratios of **Axle-2** and **Aam**.

**Table S3** Mechanical properties of **SPH**

| Gel samples with different ratios of <b>Axle-2</b> and <b>Aam</b> | Fracture stress [MPa] | Fracture strain [%] | Young's modulus [MPa] | Toughness [MJ/m <sup>3</sup> ] |
|-------------------------------------------------------------------|-----------------------|---------------------|-----------------------|--------------------------------|
| 1:20                                                              | 0.054                 | 1966                | 0.065                 | 0.09                           |
| 1:80                                                              | 0.72                  | 903                 | 0.18                  | 3.80                           |
| 1:120                                                             | 1.12                  | 243                 | 1.01                  | 1.93                           |

## Reference

- 1 A. R. Khan, P. Forgo, K. J. Stine and V. T. Souza, *Chem. Rev.*, 1998, **98**, 1977–1996.
- 2 S. Y. Jon, N. Selvapalam, D. H. Oh, J. K. Kang, S. Y. Kim, Y. J. Jeon, J. W. Lee and K. Kim, *J. Am. Chem. Soc.*, 2003, **125**, 10186.
- 3 C. Tu, W. H. Wu, W. T. Liang, D. J. Zhang, W. Xu, S. G. Wan, W. Lu and C. Yang., *Angew. Chem. Int. Ed.*, 2022, **61**, e202203541.
